# Supplementary material for: A Potential Radiomics–Clinical Model for Predicting Failure of Lymph Node Control after Definite Radiotherapy in Locally Advanced Head and Neck Cancer
Source: MDPI journal article supplement (doi:10.3390/medicina60010092), 2024-01-03
Supplement: s1 [file s1]

# Supplementary Table

Table S1. Definition of Radiomic Features

|                          | Parameter          | Formula                                                                                                                                                                              | Description                                                           | Image Biomarker Standardisation Initiative (IBSI) compliance |
|--------------------------|--------------------|--------------------------------------------------------------------------------------------------------------------------------------------------------------------------------------|-----------------------------------------------------------------------|--------------------------------------------------------------|
| Histogram-based features | Max, Min           | $\text{Max} = \text{Max}(X(i)) \text{ or } \text{Min} = \text{Min}(X(i))$ <p>Where X denotes the 3d image matrix with N voxel.</p>                                                   | Measures maximum or minimum intensity value of a histogram            | O                                                            |
|                          | Median             | $\text{Median} = \frac{X(i)}{2}$ <p>Where X denote the 3d image matrix</p>                                                                                                           | Measures median intensity value of a histogram                        | O                                                            |
|                          | Mean               | $\text{Mean} = \frac{1}{N} \sum_i^N X(i)$ <p>Where X denote the 3d image matrix with N voxel.</p>                                                                                    | Measures mean intensity value of a histogram                          | O                                                            |
|                          | Variance           | $\text{Variance} = \frac{1}{N-1} \sum_{i=1}^N (X(i) - \bar{x})^2$                                                                                                                    | Measures squared distances of each value of a histogram from the mean | O                                                            |
|                          | Standard deviation | $\text{Std} = \left( \frac{1}{N-1} \sum_{i=1}^N (X(i) - \bar{x})^2 \right)^{1/2}$ <p>Where X denote the 3d image matrix with N voxel.</p>                                            | Measures amount of variation of a histogram.                          | O                                                            |
|                          | Energy             | $\text{Energy} = \sum_i^N X(i)^2$ <p>Where X denote the 3d image matrix with N voxel.</p>                                                                                            | Measures squared magnitude value of a histogram                       | O                                                            |
|                          | Skewness           | $\text{Skewness} = \frac{E(x - \mu)^3}{\sigma^3}$ <p>Where <math>\mu</math> is the mean of x, <math>\sigma</math> is the standard deviation of x, E is the expectation operator.</p> | Measures asymmetry of a histogram.                                    | O                                                            |
|                          | Kurtosis           | $\text{Kurtosis} = \frac{E(x - \mu)^4}{\sigma^4}$ <p>Where <math>\mu</math> is the mean of x, <math>\sigma</math> is the standard deviation of x, E is</p>                           | Measures “peakedness” of a histogram (flatness of histogram)          | O                                                            |

|                                    |                      |                                                                                                                                                                                                         |                                                                                                                                                             |   |
|------------------------------------|----------------------|---------------------------------------------------------------------------------------------------------------------------------------------------------------------------------------------------------|-------------------------------------------------------------------------------------------------------------------------------------------------------------|---|
|                                    |                      | the expectation operator.                                                                                                                                                                               |                                                                                                                                                             |   |
|                                    | Root mean square     | <p>Root mean square</p> $= \sqrt{\frac{1}{N} \sum_{n=1}^N  X_n ^2}$ <p>Where <math>X</math> denote the 3d image matrix with <math>N</math> voxel.</p>                                                   | Measures the square-root of the mean of the squares of the values of the histogram. This feature is another measure of the magnitude of a histogram         | O |
|                                    | Inter quartile range | <p><math>IQR = Q_3 - Q_1</math></p> <p>Where <math>Q_3</math> denote the 3<sup>rd</sup> quartile of histogram, <math>Q_1</math> denote the 1<sup>st</sup> quartile of histogram</p>                     | Measures of variability, based on dividing a histogram into quartiles                                                                                       | O |
|                                    | Range                | <p><math>Range = range(X(i))</math></p>                                                                                                                                                                 | Measures difference between the highest and lowest voxel values of a histogram                                                                              | O |
|                                    | Percentile           | <p>Percentile</p> $= \left( \frac{n^{th} \text{ percentile}}{100} \right) X(i)$                                                                                                                         | Measures intensity value at the 2.5 <sup>th</sup> , 25 <sup>th</sup> , 50 <sup>th</sup> , 75 <sup>th</sup> , and 97.5 <sup>th</sup> percentile on histogram | O |
|                                    | Entropy              | <p><math>Entropy = - \sum_{i=1}^{N_l} P(i) \log_2 P(i)</math></p> <p>Where <math>P</math> denotes the first-order histogram with <math>N_l</math> discrete intensity levels.</p>                        | Measures irregularity of a histogram.                                                                                                                       | O |
| Shape- based features<br>(참고문헌 2개) | Uniformity           | <p><math>Uniformity = \sum_{i=1}^{N_l} P(i)^2</math></p> <p>Where <math>P</math> denotes the first-order histogram with <math>N_l</math> discrete intensity levels.</p>                                 | Measures uniformity of a histogram.                                                                                                                         | O |
|                                    | Compactness          | <p><math>Compactness = \frac{V}{\sqrt{\pi} A^{\frac{2}{3}}}</math></p> <p>Where <math>V</math> denotes the volume, and <math>A</math> denotes the surface area of the volume of interest (VOI)</p>      | Quantifies how close an object is to the smoothest shape, the circle                                                                                        | O |
|                                    | Surface area         | <p><math>SA = \sum_{i=1}^N \frac{1}{2}  a_i b_i \times a_i c_i </math></p> <p>Where <math>N</math> is the total number of triangles (coved surface area), and <math>a, b, c</math> are edge vectors</p> | The surface area of the ROI                                                                                                                                 | O |

|  |                         |                                                                                                                                                                         |                                                                                                                                       |   |
|--|-------------------------|-------------------------------------------------------------------------------------------------------------------------------------------------------------------------|---------------------------------------------------------------------------------------------------------------------------------------|---|
|  | Convexity               | $\text{Convexity} = \frac{V}{V'}$ <p>Where <math>V</math> denotes tumor volume, and <math>V'</math> denotes convex hull volume</p>                                      | Measures ratio of the ROI volume contained within the tumor to the calculated convex hull volume                                      | O |
|  | Sphericity              | $\text{Sphericity} = \frac{\frac{1}{\pi^{\frac{1}{3}}} \times (6V)^{\frac{2}{3}}}{A}$ <p>Where <math>A</math> denotes area, and <math>V</math> denotes tumor volume</p> | Measures of the roundness of the ROI                                                                                                  | O |
|  | Spherical disproportion | $\text{Spherical disproportion} = \frac{A}{4\pi R^2}$ <p>Where <math>R</math> is the radius of a sphere with the same volume as the tumor</p>                           | The ratio of the surface area of the ROI to the surface area of a sphere with the same volume as the ROI                              | O |
|  | Maximum 3D diameter     | See description in the next column                                                                                                                                      | Measures of the maximum 3D ROI diameter. It is measured as the largest pairwise Euclidean distance, between surface voxels of the ROI | O |
|  | Surface to volume ratio | $\text{Surface to volume ratio} = \frac{A}{V}$ <p>Where <math>A</math> is area, and <math>V</math> is volume</p>                                                        | Surface to volume ratio in ROI                                                                                                        | O |
|  | Volume                  | <p>Volume = <math>R \times \text{number of voxels}</math></p> <p>Where <math>R</math> denote the 3d image resolution</p>                                                | Volume of tumor (ROI)                                                                                                                 | O |
|  | Roundness factor (2D)   | <p>Roundness factor</p> $= \frac{4\pi \cdot \text{Area}}{\text{Perimeter}^2}$                                                                                           | Measure of circularity of a ROI                                                                                                       | O |
|  | Eccentricity (2D)       | $\text{Eccentricity} = c/a$ <p>Where <math>c</math> is the distance from the center to a focus and <math>a</math> is the distance from that focus to a vertex</p>       | Measure of how the tumor shape is close to the circle                                                                                 | O |
|  | Solidity (2D)           | $\text{Solidity} = \frac{\text{Area}}{\text{Convex area}}$                                                                                                              | Measure of convexity of a ROI on the 2D image                                                                                         | O |

|                                                    |                                      |                                                                                          |                                                                                                                      |   |
|----------------------------------------------------|--------------------------------------|------------------------------------------------------------------------------------------|----------------------------------------------------------------------------------------------------------------------|---|
| <b>Texture -<br/>based<br/>features<br/>(GLCM)</b> | Autocorrelation                      | Autocorrelation<br>$= \sum_{i=1}^{N_g} \sum_{j=1}^{N_g} ijP(i, j)$                       | Measures of the magnitude of the fineness and coarseness of texture                                                  | O |
|                                                    | Cluster tendency                     | Cluster tendency = $\sum_{i=1}^{N_g} \sum_{j=1}^{N_g} [i + j - \mu_x - \mu_y]^2 P(i, j)$ | Measures of the homogeneity of GLCM                                                                                  | O |
|                                                    | Maximum probability                  | Maximum probability<br>$= \max \{P(i, j)\}$                                              | Measures maximum value of GLCM matrix                                                                                | O |
|                                                    | Contrast                             | Contrast = $\sum_{i=1}^{N_g} \sum_{j=1}^{N_g}  i - j ^2 P(i, j)$                         | Measures of the local intensity variation of GLCM                                                                    | O |
|                                                    | Difference entropy                   | Difference entropy<br>$= \sum_{i=0}^{N_g-1} P_{x-y}(i) \log_2 [P_{x-y}(i)]$              | Measures entropy of processed GLCM matrix $P_{x-y}$                                                                  | O |
|                                                    | Dissimilarity                        | Dissimilarity = $\sum_{i=1}^{N_g} \sum_{j=1}^{N_g}  i - j  P(i, j)$                      | Measures difference of each element of the gray level                                                                | O |
|                                                    | Energy                               | Energy = $\sum_{i=1}^{N_g} \sum_{j=1}^{N_g} [P(i, j)]^2$                                 | Measures of the homogeneity of GLCM                                                                                  | O |
|                                                    | Entropy                              | Entropy<br>$= - \sum_{i=1}^{N_g} \sum_{j=1}^{N_g} P(i, j) \log_2 [P(i, j)]$              | Measures irregularity of gray level.                                                                                 | O |
|                                                    | Homogeneity                          | Homogeneity<br>$= \sum_{i=1}^{N_g} \sum_{j=1}^{N_g} \frac{P(i, j)}{1 +  i - j }$         | Measures closeness of gray-level.                                                                                    | O |
|                                                    | Informational measure of correlation | IMC = $HXY - \frac{HXY1}{\max \{HX, HY\}}$                                               | Secondary measure of Homogeneity                                                                                     | O |
|                                                    | Variance                             | Variance = $\sum_{i=1}^{N_g} \sum_{j=1}^{N_g} (i - \mu_x)^2 P(i, j)$                     | Measures dispersion of the parameter values around the mean of the combinations of reference and neighborhood pixels | O |

|                                                                                                                                                                                                                                                                                                                                                                                                                                                                                                                                                                                                                                                                                                                                                                                                                                                                                                                                                                                                                                                                                                                                                                                                                                                                                                                                                                                                                                                                                                                                                                                                                                                                |                                                                                                                                                                                                                                                                                                                                  |                                                                                                                                    |                                                                         |   |
|----------------------------------------------------------------------------------------------------------------------------------------------------------------------------------------------------------------------------------------------------------------------------------------------------------------------------------------------------------------------------------------------------------------------------------------------------------------------------------------------------------------------------------------------------------------------------------------------------------------------------------------------------------------------------------------------------------------------------------------------------------------------------------------------------------------------------------------------------------------------------------------------------------------------------------------------------------------------------------------------------------------------------------------------------------------------------------------------------------------------------------------------------------------------------------------------------------------------------------------------------------------------------------------------------------------------------------------------------------------------------------------------------------------------------------------------------------------------------------------------------------------------------------------------------------------------------------------------------------------------------------------------------------------|----------------------------------------------------------------------------------------------------------------------------------------------------------------------------------------------------------------------------------------------------------------------------------------------------------------------------------|------------------------------------------------------------------------------------------------------------------------------------|-------------------------------------------------------------------------|---|
| <p>Where <math>\mathbf{P}(i, j)</math> is the gray level co-occurrence matrix for <math>(\delta = 1, \alpha = 0)</math>,</p> <p><math>N_g</math> is the number of discrete intensity value in the image,</p> <p><math>N</math> is the number of voxels in the ROI,</p> <p><math>\mu</math> is the mean of <math>\mathbf{P}(i, j)</math>,</p> <p><math>p_x(i) = \sum_{j=1}^{N_g} \mathbf{P}(i, j)</math> is the marginal row probabilities,</p> <p><math>p_y(i) = \sum_{i=1}^{N_g} \mathbf{P}(i, j)</math> is the marginal column probabilities,</p> <p><math>\mu_x</math> is the expected value of marginal row probability,</p> <p><math>\mu_y</math> is the expected value of marginal column probability,</p> <p><math>\sigma_x</math> is the standard deviation of <math>p_x</math>,</p> <p><math>\sigma_y</math> is the standard deviation of <math>p_y</math>,</p> <p><math>p_{x+y}(k) = \sum_{i=1}^{N_g} \sum_{j=1}^{N_g} \mathbf{P}(i, j)</math> , <math>i + j = k, k = 2, 3, \dots, 2N_g</math>,</p> <p><math>p_{x-y}(k) = \sum_{i=1}^{N_g} \sum_{j=1}^{N_g} \mathbf{P}(i, j)</math> , <math> i - j  = k, k = 0, 1, \dots, N_g - 1</math>,</p> <p><math>HX = -\sum_{i=1}^{N_g} \mathbf{P}_x(i) \log_2[p_x(i)]</math> is the entropy of <math>\mathbf{P}_x</math>,</p> <p><math>HY = -\sum_{i=1}^{N_g} \mathbf{P}_y(i) \log_2[p_y(i)]</math> is the entropy of <math>\mathbf{P}_y</math>,</p> <p><math>HXY = -\sum_{i=1}^{N_g} \sum_{j=1}^{N_g} \mathbf{P}(i, j) \log_2[\mathbf{P}(i, j)]</math> is the entropy of <math>\mathbf{P}(i, j)</math></p> <p><math>HXY1 = -\sum_{i=1}^{N_g} \sum_{j=1}^{N_g} \mathbf{P}(i, j) \log(p_x(i)p_y(j))</math></p> |                                                                                                                                                                                                                                                                                                                                  |                                                                                                                                    |                                                                         |   |
| Texture - based features (GLSZM)                                                                                                                                                                                                                                                                                                                                                                                                                                                                                                                                                                                                                                                                                                                                                                                                                                                                                                                                                                                                                                                                                                                                                                                                                                                                                                                                                                                                                                                                                                                                                                                                                               | Size-zone variability                                                                                                                                                                                                                                                                                                            | Size zone variability<br>$= \frac{1}{\Theta} \sum_{m=1}^M \left[ \sum_{n=1}^N \mathbf{P}(m, n) \right]^2$                          | Variability in the size of ROI                                          | O |
|                                                                                                                                                                                                                                                                                                                                                                                                                                                                                                                                                                                                                                                                                                                                                                                                                                                                                                                                                                                                                                                                                                                                                                                                                                                                                                                                                                                                                                                                                                                                                                                                                                                                | Intensity variability                                                                                                                                                                                                                                                                                                            | Intensity variability<br>$= \frac{1}{\Theta} \sum_{n=1}^N \left[ \sum_{m=1}^M \mathbf{P}(m, n) \right]^2$                          | Variability in the intensity of ROI                                     | O |
|                                                                                                                                                                                                                                                                                                                                                                                                                                                                                                                                                                                                                                                                                                                                                                                                                                                                                                                                                                                                                                                                                                                                                                                                                                                                                                                                                                                                                                                                                                                                                                                                                                                                | <p>Where <math>\mathbf{P}(m, n)</math> is the intensity size zone matrix</p> <p><math>\Theta</math> represents the number of homogeneous areas in tumor,</p> <p><math>M</math> is the number of distinct intensity values,</p> <p><math>N</math> is the size of homogeneous area in the matrix <math>\mathbf{P}(m, n)</math></p> |                                                                                                                                    |                                                                         |   |
| Filter-based features (LoG)<br>(참고문헌 1개 삽입)                                                                                                                                                                                                                                                                                                                                                                                                                                                                                                                                                                                                                                                                                                                                                                                                                                                                                                                                                                                                                                                                                                                                                                                                                                                                                                                                                                                                                                                                                                                                                                                                                    | Mean                                                                                                                                                                                                                                                                                                                             | $\text{Mean} = \frac{1}{N} \sum_i G(i)$ <p>Where <math>G</math> denote the filtered 3d image matrix with <math>N</math> voxel.</p> | Measurement of mean of ROI image processed by LoG filter                | O |
|                                                                                                                                                                                                                                                                                                                                                                                                                                                                                                                                                                                                                                                                                                                                                                                                                                                                                                                                                                                                                                                                                                                                                                                                                                                                                                                                                                                                                                                                                                                                                                                                                                                                | Max                                                                                                                                                                                                                                                                                                                              | $\text{Max} = \text{Max}(G(i))$ <p>Where <math>G</math> denotes the filtered 3d image matrix with <math>N</math> voxel.</p>        | Measurement of max intensity value of ROI image processed by LoG filter | O |

|                                                                                                                                                                                                                                                |                                                                                                                                                                                                                             |                                                                             |   |
|------------------------------------------------------------------------------------------------------------------------------------------------------------------------------------------------------------------------------------------------|-----------------------------------------------------------------------------------------------------------------------------------------------------------------------------------------------------------------------------|-----------------------------------------------------------------------------|---|
| Min                                                                                                                                                                                                                                            | $\text{Min} = \text{Min}(G(i))$ <p>Where <math>G</math> denotes the filtered 3d image matrix with <math>N</math> voxel.</p>                                                                                                 | Measurement of minimum intensity value of ROI image processed by LoG filter | O |
| Median                                                                                                                                                                                                                                         | $\text{Median} = \frac{G(i)}{2}$ <p>Where <math>G</math> denote the filtered 3d image matrix</p>                                                                                                                            | Measurement of median intensity value of ROI image processed by LoG filter  | O |
| Standard deviation                                                                                                                                                                                                                             | <p>Standard deviation</p> $= \left( \frac{1}{N-1} \sum_{i=1}^N (G(i) - \bar{G})^2 \right)^{1/2}$ <p>Where <math>G</math> denote the filtered 3d image matrix with <math>N</math> voxel.</p>                                 | Measurement of standard deviation of ROI image processed by LoG filter      | O |
| Skewness                                                                                                                                                                                                                                       | $\text{Skewness} = \frac{E(G - \mu)^3}{\sigma^3}$ <p>Where <math>\mu</math> is the mean of <math>G</math>, <math>\sigma</math> is the standard deviation of <math>G</math>, <math>E</math> is the expectation operator.</p> | Measurement of skewness of ROI image processed by LoG filter                | O |
| Kurtosis                                                                                                                                                                                                                                       | $\text{Kurtosis} = \frac{E(G - \mu)^4}{\sigma^4}$ <p>Where <math>\mu</math> is the mean of <math>G</math>, <math>\sigma</math> is the standard deviation of <math>G</math>, <math>E</math> is the expectation operator.</p> | Measurement of kurtosis of ROI image processed by LoG filter                | O |
| Uniformity                                                                                                                                                                                                                                     | $\text{Uniformity} = \sum_{i=1}^{N_l} P(i)^2$ <p>Where <math>P</math> denotes the first-order histogram with <math>N_l</math> discrete intensity levels.</p>                                                                | Measurement of uniformity of ROI image processed by LoG filter              | O |
| Entropy                                                                                                                                                                                                                                        | $\text{Entropy} = - \sum_{i=1}^{N_l} P(i) \log_2 P(i)$ <p>Where <math>P</math> denotes the first-order histogram with <math>N_l</math> discrete intensity levels.</p>                                                       | Measurement of entropy of ROI image processed by LoG filter                 | O |
| $G(x, y, z, \sigma) = I(x, y, z) * \frac{1}{\sigma(\sqrt{2\pi})^3} e^{-\frac{x^2+y^2+z^2}{2\sigma^2}}$ <p><math>\sigma = 0.5 - 3.5, 0.5</math> increments, where <math>I(x,y,z)</math> is the image, and <math>*</math> denote convolution</p> |                                                                                                                                                                                                                             |                                                                             |   |

Note.—GLCM = gray-level co-occurrence matrix, GLSZM = gray-level size zone matrix, LoG = Laplacian of Gaussian.
